# Supplementary material for: Antifungal Properties of Bio-AgNPs against D. pinodes and F. avenaceum Infection of Pea (Pisum sativum L.) Seedlings
Source: MDPI journal article supplement (doi:10.3390/ijms25084525), 2024-04-20
Supplement: s1 [file s1]

**Table S1.** Cotyledons fresh weight (FW) and dry weight (DW) of shoots, roots and cotyledons of 22-days-old pea seedlings, developed without infection (control), infected (on the 8<sup>th</sup> day of germination, DG) with *D. pinodes* or *F. avenaceum* after pre-treatment with water, fungicide and bio-AgNPs (at 100 and 200 mg/L).

|                                  |            |            |                     | Seedlings infected after short-term immersion in |                     |                    |                     |
|----------------------------------|------------|------------|---------------------|--------------------------------------------------|---------------------|--------------------|---------------------|
| Control                          |            |            |                     | Water                                            | Fungicide*          | bio-AgNPs          |                     |
|                                  |            |            |                     |                                                  |                     | 100 mg/L           | 200 mg/L            |
| <i>D. pinodes</i><br>infection   | FW<br>(mg) | cotyledons | 302.3 <sup>a</sup>  | 275.8 <sup>a</sup>                               | 307.2 <sup>a</sup>  | 276.5 <sup>a</sup> | 291.9 <sup>a</sup>  |
|                                  |            | shoots     | 34.6 <sup>a</sup>   | 29.5 <sup>a</sup>                                | 30.3 <sup>a</sup>   | 34.8 <sup>a</sup>  | 32.3 <sup>a</sup>   |
|                                  | DW<br>(mg) | roots      | 14.8 <sup>a</sup>   | 13.1 <sup>a</sup>                                | 15.0 <sup>a</sup>   | 16.0 <sup>a</sup>  | 15.5 <sup>a</sup>   |
|                                  |            | cotyledons | 73.6 <sup>a</sup>   | 74.9 <sup>a</sup>                                | 76.5 <sup>a</sup>   | 70.9 <sup>a</sup>  | 69.4 <sup>a</sup>   |
| <i>F. avenaceum</i><br>infection | FW<br>(mg) | cotyledons | 261.4 <sup>ab</sup> | 219.7 <sup>b</sup>                               | 255.3 <sup>ab</sup> | 109.9 <sup>a</sup> | 264.7 <sup>ab</sup> |
|                                  |            | shoots     | 47.9 <sup>a</sup>   | 38.9 <sup>a</sup>                                | 45.7 <sup>a</sup>   | 46.3 <sup>a</sup>  | 46.5 <sup>a</sup>   |
|                                  | DW<br>(mg) | roots      | 24.8 <sup>a</sup>   | 26.7 <sup>a</sup>                                | 22.3 <sup>a</sup>   | 24.4 <sup>a</sup>  | 21.6 <sup>a</sup>   |
|                                  |            | cotyledons | 57.9 <sup>a</sup>   | 45.0 <sup>a</sup>                                | 58.4 <sup>a</sup>   | 71.4 <sup>a</sup>  | 59.5 <sup>a</sup>   |

Means of 3 replicates. The same letters (a-b) by the values indicate statistically insignificant ( $P < 0.05$ ) differences (valid for roots, shoots and cotyledon separately) based on ANOVA analysis and Tukey's post-hoc corrections.

\* The fungicide Amistar 250 SC (22.82% of azoxystrobin) was used against *D. pinodes* and Toledo Extra 430 SC (33.29% of tebuconazole) against *F. avenaceum*.

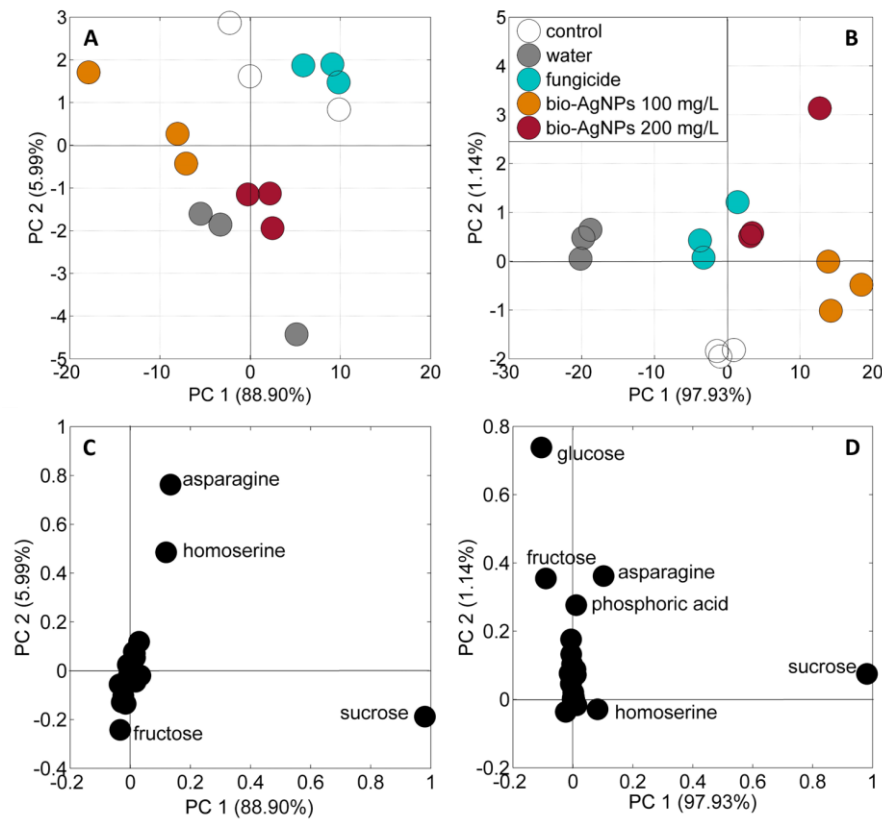

**Figure S1.** PCA (A, B) and loading plots (C, D) of cotyledon's metabolic profiles of 22-day-old seedlings of pea (*Pisum sativum* L.), 14 days after *D. pinodes* (A, C) and *F. avenaceum* (B, D) inoculation, respectively. Abbreviations: control – non-infected seedlings; water, fungicide, bio-AgNPs 100 and 200 mg/L – seedlings pretreated with water, fungicide (azoxystrobin or tebuconazole, respectively) or bio-AgNPs (at 100 and 200 mg/L), respectively, before infection with *D. pinodes* or *F. avenaceum*.

**Table S2.** The concentration of total identified polar metabolites (TIPMs), including total soluble carbohydrates (TSCs), total amino acids (TAAs), total organic acids (TOAs), and total remaining compounds (TRCs) **in roots** of 22-day-old pea seedlings (*Pisum sativum* L.), 14 days post-inoculation with *D. pinodes*.

| Metabolites          | Control             | <i>D. pinodes</i> infection |                    |                    |                     |
|----------------------|---------------------|-----------------------------|--------------------|--------------------|---------------------|
|                      |                     | Water                       | Fungicide          | bio-Ag NPs         |                     |
|                      |                     |                             |                    | 100 mg/L           | 200 mg/L            |
|                      |                     | mg/g DW                     |                    |                    |                     |
| TIPMs, including:    | 64.90 <sup>b</sup>  | 65.53 <sup>b</sup>          | 74.17 <sup>a</sup> | 58.12 <sup>c</sup> | 56.21 <sup>c</sup>  |
| TSCs, including:     | 17.16 <sup>ab</sup> | 15.74 <sup>c</sup>          | 17.70 <sup>a</sup> | 16.83 <sup>b</sup> | 12.29 <sup>d</sup>  |
| fructose             | 0.05 <sup>c</sup>   | 0.10 <sup>a</sup>           | 0.06 <sup>b</sup>  | 0.06 <sup>bc</sup> | 0.05 <sup>c</sup>   |
| galactose            | 0.34 <sup>a</sup>   | 0.12 <sup>d</sup>           | 0.20 <sup>c</sup>  | 0.26 <sup>b</sup>  | 0.19 <sup>c</sup>   |
| glucose              | 1.43 <sup>a</sup>   | 0.53 <sup>e</sup>           | 0.68 <sup>d</sup>  | 1.06 <sup>b</sup>  | 0.88 <sup>c</sup>   |
| <i>myo</i> -inositol | 1.25 <sup>a</sup>   | 0.99 <sup>c</sup>           | 0.97 <sup>c</sup>  | 1.16 <sup>b</sup>  | 0.90 <sup>d</sup>   |
| sucrose              | 13.82 <sup>b</sup>  | 13.64 <sup>b</sup>          | 15.48 <sup>a</sup> | 13.91 <sup>b</sup> | 9.99 <sup>c</sup>   |
| gluconic acid        | 0.28 <sup>b</sup>   | 0.37 <sup>a</sup>           | 0.31 <sup>b</sup>  | 0.38 <sup>a</sup>  | 0.28 <sup>b</sup>   |
| TAAs, including:     | 36.19 <sup>bc</sup> | 39.06 <sup>b</sup>          | 45.25 <sup>a</sup> | 31.33 <sup>c</sup> | 34.11 <sup>bc</sup> |
| alanine              | 0.40 <sup>c</sup>   | 0.60 <sup>a</sup>           | 0.59 <sup>a</sup>  | 0.34 <sup>c</sup>  | 0.51 <sup>b</sup>   |
| asparagine           | 1.35 <sup>c</sup>   | 4.32 <sup>a</sup>           | 4.63 <sup>a</sup>  | 1.83 <sup>bc</sup> | 2.59 <sup>b</sup>   |
| aspartic acid        | 0.58 <sup>b</sup>   | 0.61 <sup>ab</sup>          | 0.64 <sup>a</sup>  | 0.50 <sup>c</sup>  | 0.49 <sup>c</sup>   |
| β-alanine            | 0.02 <sup>d</sup>   | 0.08 <sup>a</sup>           | 0.05 <sup>b</sup>  | 0.04 <sup>c</sup>  | 0.04 <sup>c</sup>   |
| GABA                 | 0.34 <sup>e</sup>   | 3.28 <sup>a</sup>           | 2.15 <sup>b</sup>  | 1.71 <sup>c</sup>  | 1.54 <sup>d</sup>   |
| glutamic acid        | 0.34 <sup>d</sup>   | 0.55 <sup>b</sup>           | 0.66 <sup>a</sup>  | 0.35 <sup>d</sup>  | 0.43 <sup>c</sup>   |
| homoserine           | 30.94 <sup>ab</sup> | 26.55 <sup>bc</sup>         | 33.75 <sup>a</sup> | 24.40 <sup>c</sup> | 26.33 <sup>bc</sup> |
| hydroxyproline       | 0.32 <sup>a</sup>   | 0.25 <sup>b</sup>           | 0.32 <sup>a</sup>  | 0.30 <sup>ab</sup> | 0.27 <sup>b</sup>   |
| isoleucine           | 0.29 <sup>a</sup>   | 0.31 <sup>a</sup>           | 0.28 <sup>a</sup>  | 0.28 <sup>a</sup>  | 0.27 <sup>a</sup>   |
| lysine               | 0.00 <sup>c</sup>   | 0.13 <sup>a</sup>           | 0.07 <sup>ab</sup> | 0.05 <sup>bc</sup> | 0.09 <sup>ab</sup>  |
| phenylalanine        | 0.15 <sup>a</sup>   | 0.17 <sup>a</sup>           | 0.18 <sup>a</sup>  | 0.14 <sup>a</sup>  | 0.20 <sup>a</sup>   |
| proline              | 0.05 <sup>c</sup>   | 0.39 <sup>a</sup>           | 0.16 <sup>b</sup>  | 0.09 <sup>c</sup>  | 0.06 <sup>c</sup>   |
| serine               | 0.48 <sup>b</sup>   | 0.63 <sup>a</sup>           | 0.64 <sup>a</sup>  | 0.49 <sup>b</sup>  | 0.41 <sup>b</sup>   |
| threonine            | 0.64 <sup>ab</sup>  | 0.79 <sup>a</sup>           | 0.79 <sup>a</sup>  | 0.47 <sup>b</sup>  | 0.60 <sup>ab</sup>  |
| tyrosine             | 0.00 <sup>e</sup>   | 0.07 <sup>a</sup>           | 0.03 <sup>c</sup>  | 0.02 <sup>d</sup>  | 0.03 <sup>b</sup>   |
| valine               | 0.28 <sup>b</sup>   | 0.33 <sup>a</sup>           | 0.31 <sup>a</sup>  | 0.27 <sup>b</sup>  | 0.24 <sup>c</sup>   |
| TOAs, including:     | 3.57 <sup>bc</sup>  | 3.74 <sup>a</sup>           | 3.68 <sup>ab</sup> | 3.44 <sup>c</sup>  | 3.24 <sup>d</sup>   |
| butyric acid         | 0.19 <sup>b</sup>   | 0.23 <sup>a</sup>           | 0.12 <sup>c</sup>  | 0.19 <sup>b</sup>  | 0.17 <sup>b</sup>   |
| citric acid          | 0.91 <sup>a</sup>   | 0.68 <sup>d</sup>           | 0.91 <sup>a</sup>  | 0.74 <sup>c</sup>  | 0.79 <sup>b</sup>   |
| lactic acid          | 0.25 <sup>a</sup>   | 0.30 <sup>a</sup>           | 0.24 <sup>a</sup>  | 0.28 <sup>a</sup>  | 0.27 <sup>a</sup>   |
| malic acid           | 1.71 <sup>b</sup>   | 1.77 <sup>ab</sup>          | 1.84 <sup>a</sup>  | 1.77 <sup>ab</sup> | 1.34 <sup>c</sup>   |
| malonic acid         | 0.12 <sup>bc</sup>  | 0.14 <sup>a</sup>           | 0.13 <sup>ab</sup> | 0.10 <sup>c</sup>  | 0.12 <sup>bc</sup>  |
| oxalic acid          | 0.17 <sup>c</sup>   | 0.20 <sup>a</sup>           | 0.18 <sup>b</sup>  | 0.14 <sup>d</sup>  | 0.16 <sup>c</sup>   |
| succinic acid        | 0.23 <sup>d</sup>   | 0.42 <sup>a</sup>           | 0.26 <sup>c</sup>  | 0.21 <sup>d</sup>  | 0.38 <sup>b</sup>   |
| TRCs, including:     | 7.98 <sup>a</sup>   | 6.99 <sup>c</sup>           | 7.55 <sup>b</sup>  | 6.53 <sup>d</sup>  | 6.57 <sup>d</sup>   |
| phosphoric acid      | 7.77 <sup>a</sup>   | 6.69 <sup>c</sup>           | 7.31 <sup>b</sup>  | 6.31 <sup>d</sup>  | 6.40 <sup>cd</sup>  |
| urea                 | 0.21 <sup>c</sup>   | 0.30 <sup>a</sup>           | 0.24 <sup>b</sup>  | 0.22 <sup>bc</sup> | 0.17 <sup>d</sup>   |

Means of 3 replicates. The same superscript letters by the values indicate statistically insignificant differences (P<0.05) based on ANOVA analysis and Tukey's post- hoc corrections (valid in rows).

**Table S3.** The concentration of total identified polar metabolites (TIPMs), including total soluble carbohydrates (TSCs), total amino acids (TAAs), total organic acids (TOAs), and total remaining compounds (TRCs) **in shoots** of 22-day-old pea seedlings (*Pisum sativum* L.), 14 days post-inoculation with *D. pinodes*.

| Metabolites            | Control             | <i>D. pinodes</i> infection |                    |                    |                     |
|------------------------|---------------------|-----------------------------|--------------------|--------------------|---------------------|
|                        |                     | Water                       | Fungicide          | bio-Ag NPs         |                     |
|                        |                     |                             |                    | 100 mg/L           | 200 mg/L            |
|                        |                     | mg/g DW                     |                    |                    |                     |
| TIPMs, including:      | 121.26 <sup>a</sup> | 82.87 <sup>b</sup>          | 80.22 <sup>b</sup> | 80.25 <sup>b</sup> | 80.84 <sup>b</sup>  |
| TSCs, including:       | 47.41 <sup>a</sup>  | 20.46 <sup>b</sup>          | 18.00 <sup>c</sup> | 18.77 <sup>c</sup> | 19.01 <sup>bc</sup> |
| fructose               | 0.22 <sup>b</sup>   | 0.64 <sup>a</sup>           | 0.26 <sup>b</sup>  | 0.23 <sup>b</sup>  | 0.18 <sup>b</sup>   |
| galactose              | 1.23 <sup>a</sup>   | 0.62 <sup>b</sup>           | 0.49 <sup>c</sup>  | 0.62 <sup>b</sup>  | 0.56 <sup>bc</sup>  |
| glucose                | 1.73 <sup>a</sup>   | 1.77 <sup>a</sup>           | 1.70 <sup>ab</sup> | 1.26 <sup>c</sup>  | 1.36 <sup>bc</sup>  |
| <i>myo</i> -inositol   | 1.88 <sup>a</sup>   | 1.36 <sup>bc</sup>          | 1.28 <sup>c</sup>  | 1.43 <sup>b</sup>  | 1.42 <sup>b</sup>   |
| sucrose                | 41.63 <sup>a</sup>  | 15.29 <sup>b</sup>          | 13.64 <sup>b</sup> | 14.40 <sup>b</sup> | 14.84 <sup>b</sup>  |
| gluconic acid          | 0.74 <sup>b</sup>   | 0.78 <sup>ab</sup>          | 0.63 <sup>c</sup>  | 0.83 <sup>a</sup>  | 0.63 <sup>c</sup>   |
| TAAs, including:       | 59.63 <sup>a</sup>  | 44.82 <sup>b</sup>          | 46.27 <sup>b</sup> | 45.21 <sup>b</sup> | 45.48 <sup>b</sup>  |
| alanine                | 0.66 <sup>bc</sup>  | 0.77 <sup>b</sup>           | 0.59 <sup>c</sup>  | 0.71 <sup>bc</sup> | 0.95 <sup>a</sup>   |
| asparagine             | 10.43 <sup>a</sup>  | 2.95 <sup>c</sup>           | 7.62 <sup>b</sup>  | 6.42 <sup>b</sup>  | 6.00 <sup>b</sup>   |
| aspartic acid          | 1.10 <sup>c</sup>   | 2.38 <sup>a</sup>           | 1.85 <sup>b</sup>  | 2.12 <sup>ab</sup> | 2.16 <sup>a</sup>   |
| β-alanine              | 0.13 <sup>a</sup>   | 0.08 <sup>b</sup>           | 0.15 <sup>a</sup>  | 0.15 <sup>a</sup>  | 0.15 <sup>a</sup>   |
| GABA                   | 1.08 <sup>c</sup>   | 1.86 <sup>a</sup>           | 1.47 <sup>b</sup>  | 1.64 <sup>ab</sup> | 1.54 <sup>ab</sup>  |
| glutamic acid          | 1.53 <sup>a</sup>   | 1.26 <sup>abc</sup>         | 1.17 <sup>c</sup>  | 1.19 <sup>bc</sup> | 1.48 <sup>ab</sup>  |
| homoserine             | 34.90 <sup>a</sup>  | 30.09 <sup>ab</sup>         | 28.62 <sup>b</sup> | 27.38 <sup>b</sup> | 26.95 <sup>b</sup>  |
| hydroxyproline         | 0.97 <sup>a</sup>   | 0.43 <sup>b</sup>           | 0.43 <sup>b</sup>  | 0.54 <sup>b</sup>  | 0.56 <sup>b</sup>   |
| isoleucine             | 0.68 <sup>ab</sup>  | 0.69 <sup>a</sup>           | 0.55 <sup>c</sup>  | 0.57 <sup>bc</sup> | 0.65 <sup>abc</sup> |
| lysine                 | 0.16 <sup>a</sup>   | 0.00 <sup>c</sup>           | 0.17 <sup>a</sup>  | 0.12 <sup>b</sup>  | 0.14 <sup>ab</sup>  |
| phenylalanine          | 0.55 <sup>a</sup>   | 0.44 <sup>b</sup>           | 0.41 <sup>b</sup>  | 0.42 <sup>b</sup>  | 0.52 <sup>a</sup>   |
| proline                | 3.05 <sup>a</sup>   | 1.10 <sup>b</sup>           | 0.41 <sup>c</sup>  | 1.08 <sup>b</sup>  | 1.22 <sup>b</sup>   |
| serine                 | 0.92 <sup>a</sup>   | 0.43 <sup>c</sup>           | 0.51 <sup>bc</sup> | 0.58 <sup>b</sup>  | 0.46 <sup>c</sup>   |
| threonine              | 1.79 <sup>a</sup>   | 0.89 <sup>c</sup>           | 1.12 <sup>bc</sup> | 0.95 <sup>c</sup>  | 1.27 <sup>b</sup>   |
| tyrosine               | 0.12 <sup>b</sup>   | 0.19 <sup>ab</sup>          | 0.20 <sup>ab</sup> | 0.20 <sup>ab</sup> | 0.24 <sup>a</sup>   |
| valine                 | 1.55 <sup>a</sup>   | 1.26 <sup>b</sup>           | 1.00 <sup>c</sup>  | 1.14 <sup>b</sup>  | 1.18 <sup>b</sup>   |
| TOAs, including:       | 3.54 <sup>d</sup>   | 4.32 <sup>b</sup>           | 3.91 <sup>c</sup>  | 3.94 <sup>c</sup>  | 5.06 <sup>a</sup>   |
| butyric acid           | 0.62 <sup>a</sup>   | 0.53 <sup>c</sup>           | 0.38 <sup>e</sup>  | 0.48 <sup>d</sup>  | 0.57 <sup>b</sup>   |
| citric acid            | 1.10 <sup>c</sup>   | 1.04 <sup>c</sup>           | 1.35 <sup>a</sup>  | 1.26 <sup>b</sup>  | 1.19 <sup>b</sup>   |
| lactic acid            | 0.09 <sup>b</sup>   | 0.32 <sup>a</sup>           | 0.17 <sup>b</sup>  | 0.12 <sup>b</sup>  | 0.33 <sup>a</sup>   |
| malic acid             | 0.76 <sup>c</sup>   | 1.02 <sup>a</sup>           | 0.76 <sup>c</sup>  | 0.91 <sup>b</sup>  | 0.73 <sup>c</sup>   |
| malonic acid           | 0.20 <sup>a</sup>   | 0.16 <sup>b</sup>           | 0.10 <sup>c</sup>  | 0.15 <sup>b</sup>  | 0.16 <sup>b</sup>   |
| oxalic acid            | 0.20 <sup>b</sup>   | 0.36 <sup>a</sup>           | 0.24 <sup>b</sup>  | 0.24 <sup>b</sup>  | 0.26 <sup>b</sup>   |
| succinic acid          | 0.57 <sup>d</sup>   | 0.90 <sup>b</sup>           | 0.91 <sup>b</sup>  | 0.78 <sup>c</sup>  | 1.81 <sup>a</sup>   |
| TRCs (phosphoric acid) | 10.68 <sup>d</sup>  | 13.25 <sup>a</sup>          | 12.03 <sup>b</sup> | 12.34 <sup>b</sup> | 11.29 <sup>c</sup>  |

Means of 3 replicates. The same superscript letters by the values indicate statistically insignificant differences (P<0.05) based on ANOVA analysis and Tukey's post- hoc corrections (valid in rows).

**Table S4.** The concentration of total identified polar metabolites (TIPMs), including total soluble carbohydrates (TSCs), total amino acids (TAAs), total organic acids (TOAs), and total remaining compounds (TRCs) **in cotyledons** of 22-day-old pea seedlings (*Pisum sativum* L.), 14 days post-inoculation with *D. pinodes*.

| Metabolites          | Control              | <i>D. pinodes</i> infection |                     |                     |                      |
|----------------------|----------------------|-----------------------------|---------------------|---------------------|----------------------|
|                      |                      | Water                       | Fungicide           | bio-Ag NPs          |                      |
|                      |                      |                             |                     | 100 mg/L            | 200 mg/L             |
|                      |                      | mg/g DW                     |                     |                     |                      |
| TIPMs, including:    | 189.84 <sup>ab</sup> | 186.23 <sup>bc</sup>        | 201.64 <sup>a</sup> | 174.92 <sup>c</sup> | 184.09 <sup>bc</sup> |
| TSCs, including:     | 141.03 <sup>ab</sup> | 141.28 <sup>ab</sup>        | 146.83 <sup>a</sup> | 130.04 <sup>b</sup> | 141.91 <sup>ab</sup> |
| fructose             | 0.78 <sup>d</sup>    | 2.51 <sup>a</sup>           | 0.97 <sup>d</sup>   | 1.67 <sup>b</sup>   | 1.23 <sup>c</sup>    |
| galactose            | 0.26 <sup>ab</sup>   | 0.33 <sup>a</sup>           | 0.14 <sup>c</sup>   | 0.29 <sup>ab</sup>  | 0.23 <sup>b</sup>    |
| glucose              | 2.08 <sup>cd</sup>   | 2.79 <sup>a</sup>           | 1.97 <sup>d</sup>   | 2.43 <sup>b</sup>   | 2.39 <sup>bc</sup>   |
| <i>myo</i> -inositol | 3.53 <sup>bc</sup>   | 3.67 <sup>ab</sup>          | 3.69 <sup>ab</sup>  | 3.35 <sup>c</sup>   | 3.83 <sup>a</sup>    |
| sucrose              | 134.11 <sup>ab</sup> | 131.25 <sup>ab</sup>        | 139.82 <sup>a</sup> | 121.16 <sup>b</sup> | 133.80 <sup>ab</sup> |
| gluconic acid        | 0.28 <sup>d</sup>    | 0.73 <sup>b</sup>           | 0.25 <sup>d</sup>   | 1.14 <sup>a</sup>   | 0.43 <sup>c</sup>    |
| TAAs, including:     | 39.05 <sup>b</sup>   | 34.10 <sup>c</sup>          | 44.26 <sup>a</sup>  | 35.22 <sup>c</sup>  | 33.26 <sup>c</sup>   |
| alanine              | 1.01 <sup>d</sup>    | 1.41 <sup>b</sup>           | 1.62 <sup>a</sup>   | 1.54 <sup>a</sup>   | 1.17 <sup>c</sup>    |
| asparagine           | 7.21 <sup>b</sup>    | 3.50 <sup>e</sup>           | 9.34 <sup>a</sup>   | 5.67 <sup>d</sup>   | 6.42 <sup>c</sup>    |
| aspartic acid        | 0.99 <sup>b</sup>    | 0.89 <sup>b</sup>           | 1.21 <sup>a</sup>   | 1.00 <sup>b</sup>   | 0.92 <sup>b</sup>    |
| β-alanine            | 0.07 <sup>b</sup>    | 0.09 <sup>a</sup>           | 0.10 <sup>a</sup>   | 0.10 <sup>a</sup>   | 0.09 <sup>ab</sup>   |
| GABA                 | 1.83 <sup>e</sup>    | 3.32 <sup>a</sup>           | 2.65 <sup>c</sup>   | 3.08 <sup>b</sup>   | 2.22 <sup>d</sup>    |
| glutamic acid        | 0.67 <sup>a</sup>    | 0.14 <sup>c</sup>           | 0.58 <sup>ab</sup>  | 0.24 <sup>c</sup>   | 0.48 <sup>b</sup>    |
| homoserine           | 14.72 <sup>a</sup>   | 12.39 <sup>b</sup>          | 13.54 <sup>ab</sup> | 10.72 <sup>c</sup>  | 9.90 <sup>c</sup>    |
| hydroxyproline       | 0.46 <sup>a</sup>    | 0.56 <sup>a</sup>           | 0.47 <sup>a</sup>   | 0.39 <sup>a</sup>   | 0.40 <sup>a</sup>    |
| isoleucine           | 1.39 <sup>c</sup>    | 1.55 <sup>b</sup>           | 1.72 <sup>a</sup>   | 1.55 <sup>b</sup>   | 1.43 <sup>c</sup>    |
| lysine               | 0.35 <sup>c</sup>    | 0.27 <sup>c</sup>           | 0.66 <sup>a</sup>   | 0.49 <sup>b</sup>   | 0.60 <sup>a</sup>    |
| phenylalanine        | 2.72 <sup>b</sup>    | 2.31 <sup>c</sup>           | 3.24 <sup>a</sup>   | 2.42 <sup>c</sup>   | 2.45 <sup>c</sup>    |
| proline              | 0.91 <sup>a</sup>    | 0.87 <sup>a</sup>           | 0.61 <sup>b</sup>   | 0.84 <sup>a</sup>   | 0.28 <sup>c</sup>    |
| serine               | 2.02 <sup>c</sup>    | 2.12 <sup>bc</sup>          | 2.72 <sup>a</sup>   | 2.17 <sup>b</sup>   | 2.05 <sup>c</sup>    |
| threonine            | 0.74 <sup>b</sup>    | 0.94 <sup>a</sup>           | 0.99 <sup>a</sup>   | 0.90 <sup>a</sup>   | 0.76 <sup>b</sup>    |
| tyrosine             | 0.51 <sup>b</sup>    | 0.29 <sup>c</sup>           | 0.85 <sup>a</sup>   | 0.59 <sup>b</sup>   | 0.85 <sup>a</sup>    |
| valine               | 3.45 <sup>b</sup>    | 3.43 <sup>b</sup>           | 3.96 <sup>a</sup>   | 3.49 <sup>b</sup>   | 3.24 <sup>c</sup>    |
| TOAs, including:     | 2.69 <sup>b</sup>    | 3.40 <sup>a</sup>           | 3.43 <sup>a</sup>   | 3.51 <sup>a</sup>   | 2.78 <sup>b</sup>    |
| butyric acid         | 0.05 <sup>a</sup>    | 0.05 <sup>a</sup>           | 0.05 <sup>a</sup>   | 0.05 <sup>a</sup>   | 0.03 <sup>a</sup>    |
| citric acid          | 1.31 <sup>b</sup>    | 0.95 <sup>c</sup>           | 1.57 <sup>a</sup>   | 1.27 <sup>b</sup>   | 1.24 <sup>b</sup>    |
| lactic acid          | 0.06 <sup>b</sup>    | 0.19 <sup>a</sup>           | 0.09 <sup>b</sup>   | 0.12 <sup>b</sup>   | 0.06 <sup>b</sup>    |
| malic acid           | 0.51 <sup>b</sup>    | 0.45 <sup>c</sup>           | 0.60 <sup>a</sup>   | 0.52 <sup>b</sup>   | 0.45 <sup>c</sup>    |
| malonic acid         | 0.03 <sup>b</sup>    | 0.04 <sup>a</sup>           | 0.04 <sup>b</sup>   | 0.04 <sup>a</sup>   | 0.04 <sup>b</sup>    |
| oxalic acid          | 0.14 <sup>a</sup>    | 0.14 <sup>a</sup>           | 0.15 <sup>a</sup>   | 0.14 <sup>a</sup>   | 0.13 <sup>a</sup>    |
| succinic acid        | 0.59 <sup>e</sup>    | 1.57 <sup>a</sup>           | 0.94 <sup>c</sup>   | 1.37 <sup>b</sup>   | 0.83 <sup>d</sup>    |
| TRCs, including:     | 7.06 <sup>b</sup>    | 7.45 <sup>a</sup>           | 7.11 <sup>b</sup>   | 6.15 <sup>c</sup>   | 6.15 <sup>c</sup>    |
| phosphoric acid      | 7.02 <sup>b</sup>    | 7.42 <sup>a</sup>           | 7.05 <sup>b</sup>   | 6.12 <sup>c</sup>   | 6.12 <sup>c</sup>    |
| urea                 | 0.04 <sup>b</sup>    | 0.03 <sup>c</sup>           | 0.06 <sup>a</sup>   | 0.03 <sup>c</sup>   | 0.03 <sup>c</sup>    |

Means of 3 replicates. The same superscript letters by the values indicate statistically insignificant differences (P<0.05) based on ANOVA analysis and Tukey's post- hoc corrections (valid in rows).

**Table S5.** The concentration of total identified polar metabolites (TIPMs), including total soluble carbohydrates (TSCs), total amino acids (TAAs), total organic acids (TOAs), and total remaining compounds (TRCs) **in roots** of 22-day-old pea seedlings (*Pisum sativum* L.), 14 days post-inoculation with *F. avenaceum*.

| Metabolites       | Control             | <i>F. avenaceum</i> infection |                     |                     |                    |
|-------------------|---------------------|-------------------------------|---------------------|---------------------|--------------------|
|                   |                     | Water                         | Fungicide           | bio-Ag NPs          |                    |
|                   |                     |                               |                     | 100 mg/L            | 200 mg/L           |
|                   |                     | mg/g DW                       |                     |                     |                    |
| TIPMs, including: | 59.52 <sup>c</sup>  | 64.05 <sup>b</sup>            | 72.73 <sup>a</sup>  | 73.31 <sup>a</sup>  | 71.45 <sup>a</sup> |
| TSCs, including:  | 14.65 <sup>b</sup>  | 12.84 <sup>c</sup>            | 13.63 <sup>bc</sup> | 14.80 <sup>b</sup>  | 17.11 <sup>a</sup> |
| fructose          | 0.08 <sup>c</sup>   | 0.12 <sup>ab</sup>            | 0.07 <sup>c</sup>   | 0.10 <sup>bc</sup>  | 0.13 <sup>a</sup>  |
| galactose         | 0.11 <sup>bc</sup>  | 0.08 <sup>c</sup>             | 0.09 <sup>c</sup>   | 0.19 <sup>ab</sup>  | 0.25 <sup>a</sup>  |
| glucose           | 1.75 <sup>ab</sup>  | 0.99 <sup>b</sup>             | 0.51 <sup>c</sup>   | 1.88 <sup>a</sup>   | 2.12 <sup>a</sup>  |
| myo-inositol      | 1.61 <sup>a</sup>   | 1.19 <sup>d</sup>             | 1.33 <sup>c</sup>   | 1.46 <sup>b</sup>   | 1.49 <sup>b</sup>  |
| sucrose           | 10.83 <sup>bc</sup> | 10.18 <sup>c</sup>            | 11.44 <sup>b</sup>  | 10.87 <sup>bc</sup> | 12.87 <sup>a</sup> |
| gluconic acid     | 0.26 <sup>b</sup>   | 0.27 <sup>ab</sup>            | 0.19 <sup>c</sup>   | 0.29 <sup>a</sup>   | 0.25 <sup>b</sup>  |
| TAAs, including:  | 36.28 <sup>c</sup>  | 41.36 <sup>b</sup>            | 48.75 <sup>a</sup>  | 48.21 <sup>a</sup>  | 43.96 <sup>b</sup> |
| alanine           | 0.49 <sup>b</sup>   | 0.72 <sup>a</sup>             | 0.71 <sup>a</sup>   | 0.51 <sup>b</sup>   | 0.31 <sup>c</sup>  |
| asparagine        | 3.95 <sup>c</sup>   | 4.48 <sup>c</sup>             | 4.90 <sup>bc</sup>  | 6.34 <sup>a</sup>   | 6.16 <sup>ab</sup> |
| aspartic acid     | 0.50 <sup>c</sup>   | 0.63 <sup>b</sup>             | 0.78 <sup>a</sup>   | 0.54 <sup>bc</sup>  | 0.46 <sup>c</sup>  |
| β-alanine         | 0.03 <sup>c</sup>   | 0.05 <sup>a</sup>             | 0.04 <sup>ab</sup>  | 0.04 <sup>b</sup>   | 0.02 <sup>c</sup>  |
| GABA              | 0.53 <sup>d</sup>   | 0.98 <sup>b</sup>             | 0.69 <sup>c</sup>   | 1.08 <sup>a</sup>   | 0.93 <sup>b</sup>  |
| glutamic acid     | 0.37 <sup>c</sup>   | 0.63 <sup>a</sup>             | 0.48 <sup>b</sup>   | 0.48 <sup>b</sup>   | 0.52 <sup>b</sup>  |
| homoserine        | 28.44 <sup>c</sup>  | 30.94 <sup>bc</sup>           | 38.04 <sup>a</sup>  | 36.70 <sup>a</sup>  | 33.16 <sup>b</sup> |
| hydroxyproline    | 0.22 <sup>ab</sup>  | 0.22 <sup>ab</sup>            | 0.20 <sup>b</sup>   | 0.26 <sup>ab</sup>  | 0.31 <sup>a</sup>  |
| isoleucine        | 0.22 <sup>a</sup>   | 0.27 <sup>a</sup>             | 0.26 <sup>a</sup>   | 0.27 <sup>a</sup>   | 0.22 <sup>a</sup>  |
| lysine            | 0.00 <sup>c</sup>   | 0.15 <sup>ab</sup>            | 0.14 <sup>b</sup>   | 0.16 <sup>ab</sup>  | 0.20 <sup>a</sup>  |
| phenylalanine     | 0.16 <sup>c</sup>   | 0.18 <sup>bc</sup>            | 0.19 <sup>bc</sup>  | 0.23 <sup>a</sup>   | 0.21 <sup>ab</sup> |
| proline           | 0.03 <sup>c</sup>   | 0.26 <sup>b</sup>             | 0.32 <sup>a</sup>   | 0.04 <sup>c</sup>   | 0.05 <sup>c</sup>  |
| serine            | 0.48 <sup>b</sup>   | 0.69 <sup>a</sup>             | 0.76 <sup>a</sup>   | 0.50 <sup>b</sup>   | 0.47 <sup>b</sup>  |
| threonine         | 0.64 <sup>cd</sup>  | 0.77 <sup>ab</sup>            | 0.85 <sup>a</sup>   | 0.71 <sup>bc</sup>  | 0.60 <sup>d</sup>  |
| tyrosine          | 0.00 <sup>c</sup>   | 0.05 <sup>ab</sup>            | 0.03 <sup>b</sup>   | 0.05 <sup>ab</sup>  | 0.06 <sup>a</sup>  |
| valine            | 0.24 <sup>d</sup>   | 0.33 <sup>ab</sup>            | 0.35 <sup>a</sup>   | 0.30 <sup>bc</sup>  | 0.28 <sup>c</sup>  |
| TOAs, including:  | 2.86 <sup>c</sup>   | 4.08 <sup>a</sup>             | 4.20 <sup>a</sup>   | 3.40 <sup>b</sup>   | 3.03 <sup>c</sup>  |
| butyric acid      | 0.17 <sup>c</sup>   | 0.23 <sup>ab</sup>            | 0.25 <sup>a</sup>   | 0.21 <sup>bc</sup>  | 0.23 <sup>ab</sup> |
| citric acid       | 0.52 <sup>c</sup>   | 0.61 <sup>b</sup>             | 0.68 <sup>a</sup>   | 0.57 <sup>bc</sup>  | 0.57 <sup>bc</sup> |
| lactic acid       | 0.46 <sup>a</sup>   | 0.30 <sup>b</sup>             | 0.30 <sup>b</sup>   | 0.45 <sup>a</sup>   | 0.41 <sup>a</sup>  |
| malic acid        | 1.31 <sup>c</sup>   | 2.41 <sup>a</sup>             | 2.43 <sup>a</sup>   | 1.76 <sup>b</sup>   | 1.47 <sup>c</sup>  |
| malonic acid      | 0.08 <sup>b</sup>   | 0.16 <sup>a</sup>             | 0.16 <sup>a</sup>   | 0.07 <sup>b</sup>   | 0.05 <sup>c</sup>  |
| oxalic acid       | 0.16 <sup>a</sup>   | 0.17 <sup>a</sup>             | 0.15 <sup>a</sup>   | 0.16 <sup>a</sup>   | 0.17 <sup>a</sup>  |
| succinic acid     | 0.17 <sup>bc</sup>  | 0.21 <sup>a</sup>             | 0.22 <sup>a</sup>   | 0.18 <sup>b</sup>   | 0.15 <sup>c</sup>  |
| TRCs, including:  | 5.72 <sup>c</sup>   | 5.78 <sup>c</sup>             | 6.15 <sup>c</sup>   | 6.90 <sup>b</sup>   | 7.34 <sup>a</sup>  |
| phosphoric acid   | 5.49 <sup>d</sup>   | 5.60 <sup>cd</sup>            | 5.96 <sup>c</sup>   | 6.64 <sup>b</sup>   | 7.11 <sup>a</sup>  |
| urea              | 0.24 <sup>ab</sup>  | 0.18 <sup>c</sup>             | 0.19 <sup>c</sup>   | 0.26 <sup>a</sup>   | 0.23 <sup>b</sup>  |

Means of 3 replicates. The same superscript letters by the values indicate statistically insignificant differences (P<0.05) based on ANOVA analysis and Tukey's post- hoc corrections (valid in rows).

**Table S6.** The concentration of total identified polar metabolites (TIPMs), including total soluble carbohydrates (TSCs), total amino acids (TAAs), total organic acids (TOAs), and total remaining compounds (TRCs) **in shoots** of 22-day-old pea seedlings (*Pisum sativum* L.), 14 days post-inoculation with *F. avenaceum*.

| Metabolites            | Control             | <i>F. avenaceum</i> infection |                     |                     |                     |
|------------------------|---------------------|-------------------------------|---------------------|---------------------|---------------------|
|                        |                     | Water                         | Fungicide           | bio-Ag NPs          |                     |
|                        |                     |                               |                     | 100 mg/L            | 200 mg/L            |
|                        |                     | mg/g DW                       |                     |                     |                     |
| TIPMs, including:      | 117.80 <sup>b</sup> | 72.23 <sup>d</sup>            | 103.45 <sup>c</sup> | 132.60 <sup>a</sup> | 119.60 <sup>b</sup> |
| TSCs, including:       | 47.72 <sup>a</sup>  | 29.64 <sup>c</sup>            | 27.86 <sup>c</sup>  | 46.12 <sup>a</sup>  | 38.52 <sup>b</sup>  |
| fructose               | 0.68 <sup>a</sup>   | 0.87 <sup>a</sup>             | 0.70 <sup>a</sup>   | 0.56 <sup>a</sup>   | 0.60 <sup>a</sup>   |
| galactose              | 0.83 <sup>b</sup>   | 0.86 <sup>ab</sup>            | 0.87 <sup>ab</sup>  | 1.53 <sup>a</sup>   | 1.04 <sup>ab</sup>  |
| glucose                | 2.82 <sup>a</sup>   | 3.36 <sup>a</sup>             | 4.62 <sup>a</sup>   | 4.99 <sup>a</sup>   | 3.77 <sup>a</sup>   |
| <i>myo</i> -inositol   | 2.22 <sup>a</sup>   | 1.82 <sup>c</sup>             | 1.83 <sup>bc</sup>  | 1.98 <sup>b</sup>   | 1.93 <sup>bc</sup>  |
| sucrose                | 40.47 <sup>a</sup>  | 21.62 <sup>d</sup>            | 18.75 <sup>e</sup>  | 36.60 <sup>b</sup>  | 30.67 <sup>c</sup>  |
| gluconic acid          | 0.70 <sup>b</sup>   | 1.10 <sup>a</sup>             | 1.08 <sup>a</sup>   | 0.45 <sup>c</sup>   | 0.51 <sup>c</sup>   |
| TAAs, including:       | 58.82 <sup>c</sup>  | 30.31 <sup>d</sup>            | 61.82 <sup>bc</sup> | 73.94 <sup>a</sup>  | 68.74 <sup>ab</sup> |
| alanine                | 0.72 <sup>a</sup>   | 0.54 <sup>cd</sup>            | 0.49 <sup>d</sup>   | 0.57 <sup>bc</sup>  | 0.61 <sup>b</sup>   |
| asparagine             | 20.34 <sup>c</sup>  | 6.86 <sup>d</sup>             | 22.61 <sup>bc</sup> | 31.78 <sup>a</sup>  | 27.68 <sup>ab</sup> |
| aspartic acid          | 1.21 <sup>c</sup>   | 1.60 <sup>b</sup>             | 2.08 <sup>a</sup>   | 1.15 <sup>c</sup>   | 0.95 <sup>d</sup>   |
| β-alanine              | 0.11 <sup>b</sup>   | 0.04 <sup>c</sup>             | 0.05 <sup>c</sup>   | 0.10 <sup>b</sup>   | 0.12 <sup>a</sup>   |
| GABA                   | 0.99 <sup>c</sup>   | 0.92 <sup>c</sup>             | 0.87 <sup>c</sup>   | 1.34 <sup>a</sup>   | 1.16 <sup>b</sup>   |
| glutamic acid          | 1.40 <sup>a</sup>   | 0.54 <sup>b</sup>             | 1.31 <sup>a</sup>   | 1.42 <sup>a</sup>   | 1.43 <sup>a</sup>   |
| homoserine             | 23.40 <sup>b</sup>  | 14.31 <sup>c</sup>            | 27.51 <sup>a</sup>  | 26.95 <sup>a</sup>  | 27.52 <sup>a</sup>  |
| hydroxyproline         | 1.35 <sup>a</sup>   | 1.04 <sup>ab</sup>            | 0.49 <sup>c</sup>   | 1.10 <sup>ab</sup>  | 0.88 <sup>bc</sup>  |
| isoleucine             | 0.49 <sup>b</sup>   | 0.62 <sup>a</sup>             | 0.52 <sup>b</sup>   | 0.64 <sup>a</sup>   | 0.64 <sup>a</sup>   |
| lysine                 | 0.67 <sup>c</sup>   | 0.12 <sup>d</sup>             | 0.86 <sup>bc</sup>  | 1.35 <sup>a</sup>   | 1.25 <sup>ab</sup>  |
| phenylalanine          | 0.48 <sup>b</sup>   | 0.18 <sup>d</sup>             | 0.39 <sup>c</sup>   | 0.60 <sup>a</sup>   | 0.54 <sup>ab</sup>  |
| proline                | 4.46 <sup>a</sup>   | 1.11 <sup>e</sup>             | 1.59 <sup>d</sup>   | 2.96 <sup>b</sup>   | 2.34 <sup>c</sup>   |
| serine                 | 0.85 <sup>b</sup>   | 0.75 <sup>c</sup>             | 0.85 <sup>b</sup>   | 0.97 <sup>a</sup>   | 0.90 <sup>ab</sup>  |
| threonine              | 0.84 <sup>bc</sup>  | 0.59 <sup>c</sup>             | 0.90 <sup>b</sup>   | 1.22 <sup>a</sup>   | 0.99 <sup>ab</sup>  |
| tyrosine               | 0.21 <sup>ab</sup>  | 0.09 <sup>c</sup>             | 0.14 <sup>bc</sup>  | 0.23 <sup>a</sup>   | 0.22 <sup>a</sup>   |
| valine                 | 1.32 <sup>c</sup>   | 1.02 <sup>e</sup>             | 1.16 <sup>d</sup>   | 1.56 <sup>a</sup>   | 1.48 <sup>b</sup>   |
| TOAs, including:       | 3.12 <sup>b</sup>   | 3.08 <sup>b</sup>             | 3.68 <sup>a</sup>   | 3.12 <sup>b</sup>   | 3.25 <sup>b</sup>   |
| butyric acid           | 0.15 <sup>e</sup>   | 0.24 <sup>c</sup>             | 0.40 <sup>b</sup>   | 0.18 <sup>d</sup>   | 0.49 <sup>a</sup>   |
| citric acid            | 1.30 <sup>ab</sup>  | 1.17 <sup>b</sup>             | 1.43 <sup>a</sup>   | 1.32 <sup>ab</sup>  | 1.20 <sup>b</sup>   |
| lactic acid            | 0.12 <sup>a</sup>   | 0.11 <sup>a</sup>             | 0.07 <sup>a</sup>   | 0.11 <sup>a</sup>   | 0.14 <sup>a</sup>   |
| malic acid             | 0.93 <sup>b</sup>   | 0.86 <sup>c</sup>             | 1.08 <sup>a</sup>   | 0.94 <sup>b</sup>   | 0.71 <sup>d</sup>   |
| malonic acid           | 0.20 <sup>a</sup>   | 0.24 <sup>a</sup>             | 0.13 <sup>a</sup>   | 0.14 <sup>a</sup>   | 0.15 <sup>a</sup>   |
| oxalic acid            | 0.13 <sup>c</sup>   | 0.14 <sup>bc</sup>            | 0.18 <sup>ab</sup>  | 0.15 <sup>bc</sup>  | 0.19 <sup>a</sup>   |
| succinic acid          | 0.30 <sup>b</sup>   | 0.31 <sup>b</sup>             | 0.39 <sup>a</sup>   | 0.29 <sup>b</sup>   | 0.37 <sup>a</sup>   |
| TRCs (phosphoric acid) | 8.13 <sup>c</sup>   | 9.20 <sup>b</sup>             | 10.10 <sup>a</sup>  | 9.42 <sup>b</sup>   | 9.10 <sup>b</sup>   |

Means of 3 replicates. The same superscript letters by the values indicate statistically insignificant differences (P<0.05) based on ANOVA analysis and Tukey's post- hoc corrections (valid in rows).

**Table S7.** The concentration of total identified polar metabolites (TIPMs), including total soluble carbohydrates (TSCs), total amino acids (TAAs), total organic acids (TOAs), and total remaining compounds (TRCs) **in cotyledons** of 22-day-old pea seedlings (*Pisum sativum* L.), 14 days post-inoculation with *F. avenaceum*.

| Metabolites          | Control              | <i>F. avenaceum</i> infection |                      |                     |                      |
|----------------------|----------------------|-------------------------------|----------------------|---------------------|----------------------|
|                      |                      | Water                         | Fungicide            | bio-Ag NPs          |                      |
|                      |                      |                               |                      | 100 mg/L            | 200 mg/L             |
|                      |                      | mg/g DW                       |                      |                     |                      |
| TIPMs, including:    | 157.92 <sup>cd</sup> | 148.66 <sup>d</sup>           | 165.31 <sup>bc</sup> | 180.52 <sup>a</sup> | 174.42 <sup>ab</sup> |
| TSCs, including:     | 120.41 <sup>b</sup>  | 108.25 <sup>c</sup>           | 121.10 <sup>b</sup>  | 132.57 <sup>a</sup> | 129.60 <sup>ab</sup> |
| fructose             | 1.53 <sup>b</sup>    | 4.18 <sup>a</sup>             | 1.89 <sup>b</sup>    | 0.55 <sup>c</sup>   | 2.00 <sup>b</sup>    |
| galactose            | 0.94 <sup>ab</sup>   | 1.14 <sup>a</sup>             | 0.75 <sup>bc</sup>   | 0.26 <sup>d</sup>   | 0.56 <sup>c</sup>    |
| glucose              | 4.34 <sup>c</sup>    | 7.14 <sup>a</sup>             | 5.52 <sup>bc</sup>   | 2.44 <sup>d</sup>   | 5.82 <sup>ab</sup>   |
| <i>myo</i> -inositol | 3.45 <sup>c</sup>    | 4.00 <sup>a</sup>             | 3.85 <sup>ab</sup>   | 3.71 <sup>b</sup>   | 3.89 <sup>ab</sup>   |
| sucrose              | 109.97 <sup>bc</sup> | 91.18 <sup>d</sup>            | 108.55 <sup>c</sup>  | 125.44 <sup>a</sup> | 116.96 <sup>b</sup>  |
| gluconic acid        | 0.18 <sup>d</sup>    | 0.61 <sup>a</sup>             | 0.54 <sup>b</sup>    | 0.18 <sup>d</sup>   | 0.35 <sup>c</sup>    |
| TAAs, including:     | 28.97 <sup>c</sup>   | 30.72 <sup>c</sup>            | 34.03 <sup>b</sup>   | 38.10 <sup>a</sup>  | 34.84 <sup>ab</sup>  |
| alanine              | 0.75 <sup>c</sup>    | 0.99 <sup>b</sup>             | 1.07 <sup>ab</sup>   | 1.12 <sup>a</sup>   | 1.11 <sup>a</sup>    |
| asparagine           | 6.28 <sup>c</sup>    | 6.31 <sup>c</sup>             | 8.10 <sup>b</sup>    | 10.08 <sup>a</sup>  | 8.48 <sup>b</sup>    |
| aspartic acid        | 0.71 <sup>bc</sup>   | 0.75 <sup>bc</sup>            | 0.68 <sup>c</sup>    | 0.84 <sup>a</sup>   | 0.77 <sup>ab</sup>   |
| β-alanine            | 0.06 <sup>c</sup>    | 0.08 <sup>b</sup>             | 0.11 <sup>a</sup>    | 0.11 <sup>a</sup>   | 0.09 <sup>b</sup>    |
| GABA                 | 1.60 <sup>d</sup>    | 2.35 <sup>b</sup>             | 2.47 <sup>a</sup>    | 2.10 <sup>c</sup>   | 2.20 <sup>c</sup>    |
| glutamic acid        | 0.33 <sup>c</sup>    | 0.20 <sup>e</sup>             | 0.24 <sup>d</sup>    | 0.66 <sup>a</sup>   | 0.40 <sup>b</sup>    |
| homoserine           | 8.64 <sup>b</sup>    | 7.16 <sup>c</sup>             | 8.30 <sup>bc</sup>   | 10.19 <sup>a</sup>  | 8.89 <sup>ab</sup>   |
| hydroxyproline       | 0.21 <sup>b</sup>    | 0.28 <sup>ab</sup>            | 0.34 <sup>a</sup>    | 0.30 <sup>ab</sup>  | 0.31 <sup>ab</sup>   |
| isoleucine           | 1.26 <sup>c</sup>    | 1.59 <sup>a</sup>             | 1.35 <sup>bc</sup>   | 1.30 <sup>bc</sup>  | 1.39 <sup>b</sup>    |
| lysine               | 0.49 <sup>c</sup>    | 0.87 <sup>a</sup>             | 0.75 <sup>ab</sup>   | 0.68 <sup>b</sup>   | 0.89 <sup>a</sup>    |
| phenylalanine        | 2.23 <sup>c</sup>    | 2.60 <sup>ab</sup>            | 2.43 <sup>bc</sup>   | 2.71 <sup>a</sup>   | 2.53 <sup>ab</sup>   |
| proline              | 0.44 <sup>b</sup>    | 0.26 <sup>c</sup>             | 0.69 <sup>a</sup>    | 0.53 <sup>b</sup>   | 0.79 <sup>a</sup>    |
| serine               | 1.60 <sup>c</sup>    | 1.83 <sup>b</sup>             | 2.22 <sup>a</sup>    | 2.18 <sup>a</sup>   | 1.95 <sup>b</sup>    |
| threonine            | 0.72 <sup>c</sup>    | 0.98 <sup>a</sup>             | 0.93 <sup>ab</sup>   | 0.77 <sup>bc</sup>  | 0.82 <sup>abc</sup>  |
| tyrosine             | 0.86 <sup>c</sup>    | 1.32 <sup>ab</sup>            | 1.29 <sup>ab</sup>   | 1.39 <sup>a</sup>   | 1.18 <sup>b</sup>    |
| valine               | 2.76 <sup>b</sup>    | 3.15 <sup>a</sup>             | 3.08 <sup>a</sup>    | 3.16 <sup>a</sup>   | 3.03 <sup>a</sup>    |
| TOAs, including:     | 2.89 <sup>c</sup>    | 3.44 <sup>a</sup>             | 3.05 <sup>bc</sup>   | 3.25 <sup>ab</sup>  | 3.26 <sup>ab</sup>   |
| butyric acid         | 0.05 <sup>bc</sup>   | 0.04 <sup>c</sup>             | 0.06 <sup>ab</sup>   | 0.08 <sup>a</sup>   | 0.04 <sup>bc</sup>   |
| citric acid          | 1.43 <sup>bc</sup>   | 1.57 <sup>b</sup>             | 1.33 <sup>c</sup>    | 1.75 <sup>a</sup>   | 1.58 <sup>b</sup>    |
| lactic acid          | 0.05 <sup>a</sup>    | 0.07 <sup>a</sup>             | 0.10 <sup>a</sup>    | 0.05 <sup>a</sup>   | 0.07 <sup>a</sup>    |
| malic acid           | 0.55 <sup>a</sup>    | 0.55 <sup>a</sup>             | 0.48 <sup>b</sup>    | 0.48 <sup>b</sup>   | 0.55 <sup>a</sup>    |
| malonic acid         | 0.03 <sup>b</sup>    | 0.06 <sup>a</sup>             | 0.04 <sup>b</sup>    | 0.03 <sup>b</sup>   | 0.04 <sup>b</sup>    |
| oxalic acid          | 0.13 <sup>a</sup>    | 0.13 <sup>a</sup>             | 0.13 <sup>a</sup>    | 0.14 <sup>a</sup>   | 0.14 <sup>a</sup>    |
| succinic acid        | 0.64 <sup>e</sup>    | 1.02 <sup>a</sup>             | 0.92 <sup>b</sup>    | 0.71 <sup>d</sup>   | 0.84 <sup>c</sup>    |
| TRCs, including:     | 5.65 <sup>c</sup>    | 6.25 <sup>b</sup>             | 7.13 <sup>a</sup>    | 6.59 <sup>b</sup>   | 6.71 <sup>ab</sup>   |
| phosphoric acid      | 5.63 <sup>c</sup>    | 6.22 <sup>b</sup>             | 7.10 <sup>a</sup>    | 6.57 <sup>b</sup>   | 6.68 <sup>ab</sup>   |
| urea                 | 0.03 <sup>a</sup>    | 0.02 <sup>a</sup>             | 0.03 <sup>a</sup>    | 0.03 <sup>a</sup>   | 0.03 <sup>a</sup>    |

Means of 3 replicates. The same superscript letters by the values indicate statistically insignificant differences (P<0.05) based on ANOVA analysis and Tukey's post- hoc corrections (valid in rows).



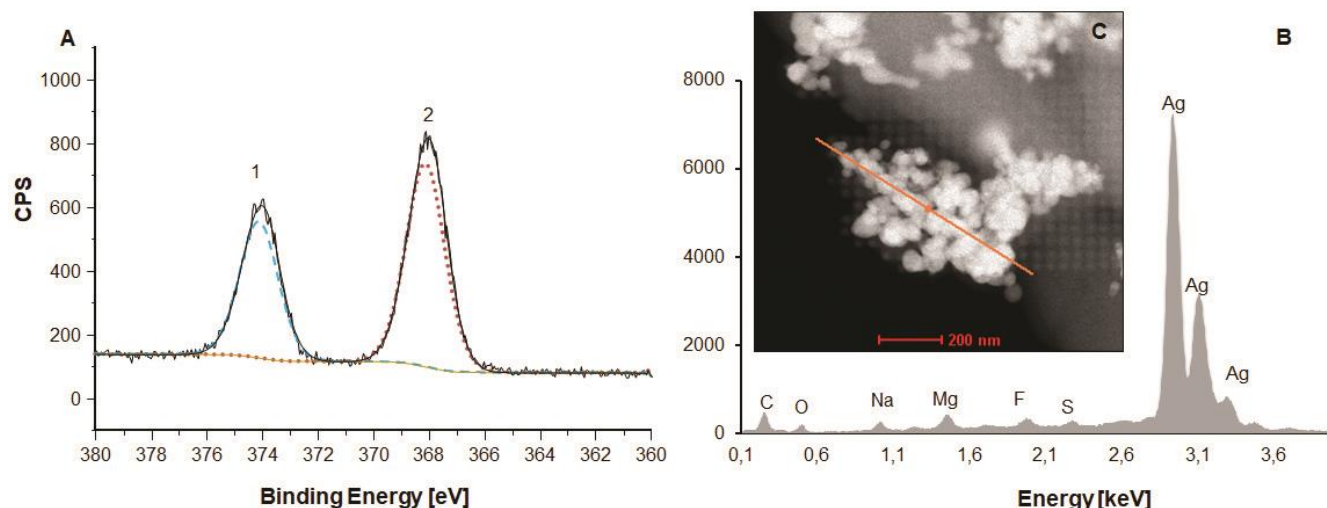

**Figure S2.** Characterization of bio-synthesized silver nanoparticles (bio-AgNPs) (A) X-ray Photoelectron Spectroscopy (XPS) wide-scan spectrum showcasing the surface chemical composition of bio-AgNPs. This spectrum displays prominent silver peaks at binding energies characteristic of Ag(3d<sub>5/2</sub>) at 368.1 eV and Ag(3d<sub>3/2</sub>) at 374.1 eV, with a full width at half maximum (FWHM) of 1.5 eV and an energy separation ( $\Delta E$ ) of 6 eV, indicating the presence and purity of silver in the nanoparticles; (B) Energy Dispersive X-ray (EDX) spectra, providing elemental composition analysis which confirms the presence of elemental silver as a major constituent along with minor traces of other elements used in the synthesis process; (C) Transmission Electron Microscopy (TEM) images in darkfield mode, revealing the morphology and size distribution of the bio-AgNPs.
